# Supplementary material
Source: PubMed Central journal article supplement (PMC3358883)
Supplement: 1204791109_pnas.201204791SI.pdf [file 1204791109_pnas.201204791SI.pdf]

# Supporting Information

Kim and Sauer 10.1073/pnas.1204791109

## SI Materials and Methods

Various *degP* mutations were introduced into *Escherichia coli* by two-step recombination as described in Davis et al. (1). For the first step (replacing the *degP* gene with a cassette encoding selectable and counter selectable markers), the mPheS-kan<sup>R</sup> allele was amplified from pJD141 with two primers (dP<sub>ss-for1</sub> and dP<sub>rev1</sub>). Cells (*E. coli* W3110) carrying pSIM5 (2) were grown in LB broth to OD<sub>600</sub> 0.3~0.5 at 30 °C, and then incubated for ~20 min at 42 °C for induction of λ-RED recombination proteins. Cells were then cooled on ice, harvested, washed with cold water, and finally resuspended in cold 10% (vol/vol) glycerol. The PCR product carrying the mPheS-kan<sup>R</sup> cassette was electroporated into cells, which were recovered, grown in Super Optimal broth with Catabolite repression (SOC) for 6~12 h at 30 °C, and plated on LB agar plus kanamycin (30 μg/mL) at 30 °C. Successful recombination was confirmed by resistance to kanamycin, sensitivity to 16 mM ρ-chlorophenylalanine (ρ-Cl-Phe), and the size difference of PCR products amplified using primers flanking the chromosomal *degP* allele.

For the second step of recombination (replacing the mPheS-kan<sup>R</sup> cassette with a mutant *degP* gene), primers insP<sub>ss-for1</sub> in combination with insP<sub>rev2</sub> (for SK330 and SK338) or insP<sub>rev3</sub> (for SK326) were used to amplify DNA fragments containing mutant *degP* genes from plasmids pSK473 (for SK326), pSK534 (for SK330), or pSK566 (for SK338). To obtain the DNA fragment for the in-frame deletion of protein-coding sequences (the Δ*degP* strain), two primers (dP<sub>orf-for</sub> and dP<sub>orf-rev</sub>) were extended using each other as templates. Recombineering was performed as described, except for using SK324 as recipient cells and plating on YEG (0.5% yeast extract, 1% NaCl, and 0.4% glucose) agar/ρ-Cl-Phe (16 mM). Successful recombination was confirmed by resistance to ρ-Cl-Phe, sensitivity to kanamycin, and DNA sequencing of chromosomal *degP* locus. Cells were also tested for the removal of pSIM5 (Cm<sup>R</sup>) on LB agar/chloramphenicol (10 μg/mL), and, if necessary, cells were restreaked on LB agar plate and grown at 37 °C to remove pSIM5.

1. Davis JH, Baker TA, Sauer RT (2011) Small-molecule control of protein degradation using split adaptors. *ACS Chem Biol* 6:1205–1213.

2. Datta S, Costantino N, Court DL (2006) A set of recombineering plasmids for gram-negative bacteria. *Gene* 379:109–115.

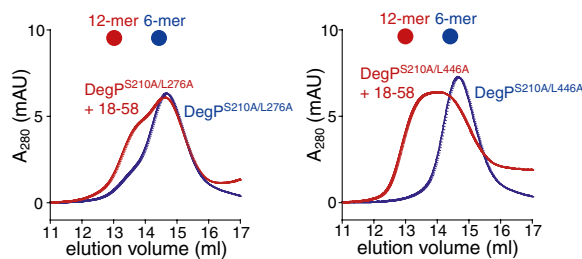

Fig. S1. The L276A and L446A mutations destabilize but do not prevent cage formation. Gel-filtration chromatograms of DegP<sup>S210A/L276A</sup> and DegP<sup>S210A/L446A</sup> in the absence and presence of 18–58. Blue dots mark the elution position of DegP<sup>S210A</sup>; red dots mark the elution position of DegP<sup>S210A</sup> plus 18–58.

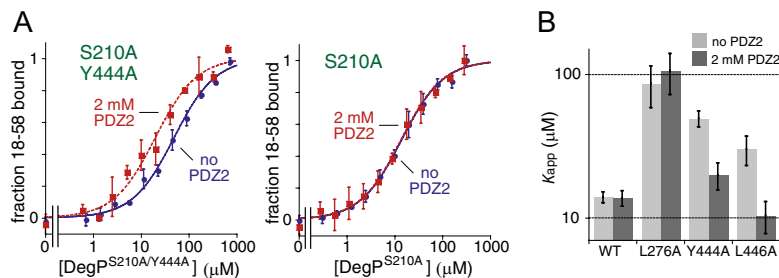

Fig. S2. PDZ1–PDZ2' interactions enhance substrate binding. (A) Addition of 2 mM PDZ2 domain enhanced substrate binding to DegP<sup>S210A/Y444A</sup> (Left), but not to DegP<sup>S210A</sup> (Right). Binding of <sup>15</sup>C-18–58 was monitored by changes in fluorescence anisotropy. The curves are fits to a hyperbolic equation. Error bars are averages ± 1 SD (n = 3). (B) The 2 mM PDZ2 decreased K<sub>app</sub> for <sup>15</sup>C-18–58 binding to DegP<sup>S210A/Y444A</sup> and DegP<sup>S210A/L446A</sup>, but not to DegP<sup>S210A</sup> and DegP<sup>S210A/L276A</sup>, indicating that the affinity-enhancing effects depend on PDZ1–PDZ2' interactions. Bars represent the error of fitting to hyperbolic binding curves, as shown in Fig. S2A.

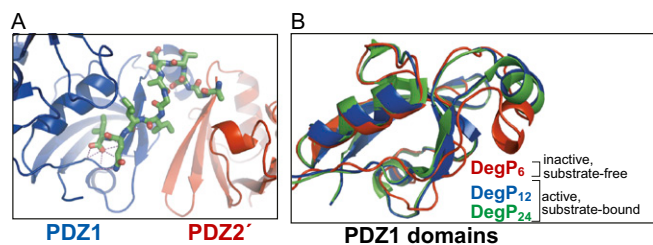

**Fig. S3.** Structural mechanisms that might link substrate binding to enhanced PDZ1–PDZ2' interactions. (A) The C terminus of the 18–58 substrate (green; stick representation) binds to the PDZ1 domain (blue; cartoon representation) in chain C of the dodecamer (PDB ID code 3OTP), but some substrate residues are also very near the neighboring PDZ2' domain (red; cartoon representation). Contacts of this type might couple substrate binding to cage formation. (B) PDZ1 domains in substrate-bound cages (blue, 3OTP; green, 3C50) have slightly different conformations than a PDZ1 domain in a substrate-free hexamer (red; 1KY9). The blue and green domains superimpose with an rmsd of  $\sim 0.24$  Å for 364 main-chain atoms, whereas the blue and red domains superimpose with an rmsd of  $\sim 1.6$  Å for 309 main-chain atoms.

**Table S1. Strains, plasmids, and primers for genetic study**

| Name                              | Description                                                        |
|-----------------------------------|--------------------------------------------------------------------|
| <b>Strains</b>                    |                                                                    |
| W3110                             | Wild type                                                          |
| SK324                             | W3110 <i>degP::mPheS-kan<sup>R</sup></i>                           |
| SK345                             | W3110 $\Delta degP(orf)$                                           |
| SK326                             | W3110 <i>degP(Y444A)</i>                                           |
| SK330                             | W3110 <i>degP(\Delta linker)</i>                                   |
| SK338                             | W3110 <i>degP(+20_linker)</i>                                      |
| <b>Plasmids</b>                   |                                                                    |
| pSIM5 (2)                         | Carries lambda RED recombination genes, pSC101ts origin            |
| pJD141                            | carries <i>mPheS-kan<sup>R</sup></i>                               |
| p7                                | Overexpression of wild-type DegP with N-terminal His-tag           |
| pSK473                            | Overexpression of DegP(Y444A) with N-terminal His-tag              |
| pSK534                            | Overexpression of DegP(\Delta linker) with N-terminal His-tag      |
| pSK566                            | Overexpression of DegP(+20_linker) with N-terminal His-tag         |
| <b>Primers for recombineering</b> |                                                                    |
| dP_ss_for1                        | GAGTTTAGGTTTGGCGTTATCTCCGCTCTGCAACGGCGgaattcgcggccgcttctag         |
| dP_rev1                           | GGAGAACCCCTTCCCGTTTTAGGAAGGGGTTGAGGGAGActgcagcggccgctactagt        |
| insP_ss-for1                      | GAGTTTAGGTTTGGCGTTATCTCCGCTCTGCAACGGCGgctgagacttctcagcaac          |
| insP_rev2                         | GAACCCCTTCCCGTTTTAGGAAGGGGTTGAGGGAGAttactgcattaacaggtagatgg        |
| insP_rev3                         | GAACCCCTTCCCGTTTTAGGAAGGGGTTGAGGGAGAttactgcattaacagggcgatgggtgctgt |
| dP_orf-for                        | GAAGAACACAGCAATTTTGCCTTATCTGTTAATCGAGACTGAAATAC TCTCCCTCAACCC      |
| dP_orf-rev                        | ATTGTAAGGAGAACCCCTTCCCGTTTTAGGAAGGGGTTGAGGGAGA GTATTTCAGTCTC       |

Sequences in uppercase are homologous to the *E. coli degP* locus; sequences in lowercase are used for amplification from plasmids.
